# Supplementary material for: A novel dual-functional fluorescent chemosensor for the selective detection of 2,4,6-trinitrotoluene and Hg2+
Source: Royal Society of Chemistry journal article supplement (doi:10.1039/c5nj01347j), 2015-01-01
Supplement: c5nj01347j1.pdf [file c5nj01347j1.pdf]

Supporting information for:

**A novel dual-functional fluorescent chemosensor for selective  
detection of 2,4,6-trinitrotoluene and Hg<sup>2+</sup>**

MeiMei Liu, Gang Li \* and ZhuHong Cheng

State Key Laboratory of Fine Chemicals, School of Chemical Engineering,  
Dalian University of Technology, Dalian, 116024, P. R. China.

**Contents**

**Figure S1** FT-IR spectra of R + Au/Tb-BTC and R/Au/Tb-BTC.

**Figure S2** UV-vis spectra of R + Au/Tb-BTC and R/Au/Tb-BTC.

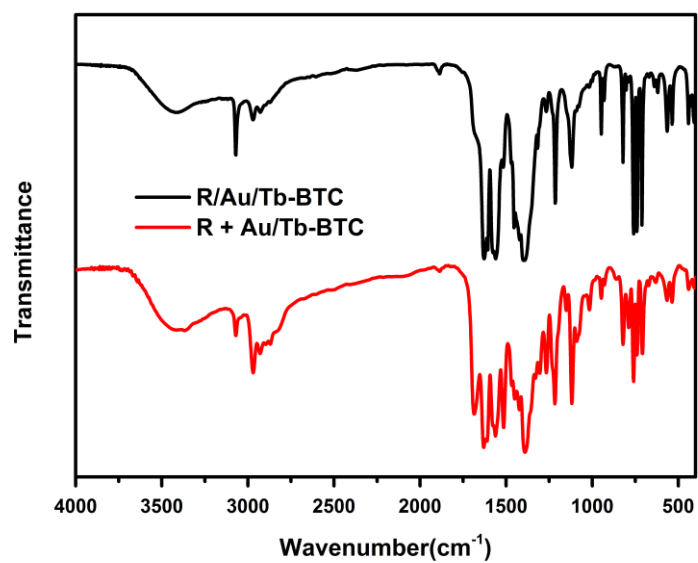

**Figure S1** FT-IR spectra of R + Au/Tb-BTC and R/Au/Tb-BTC.

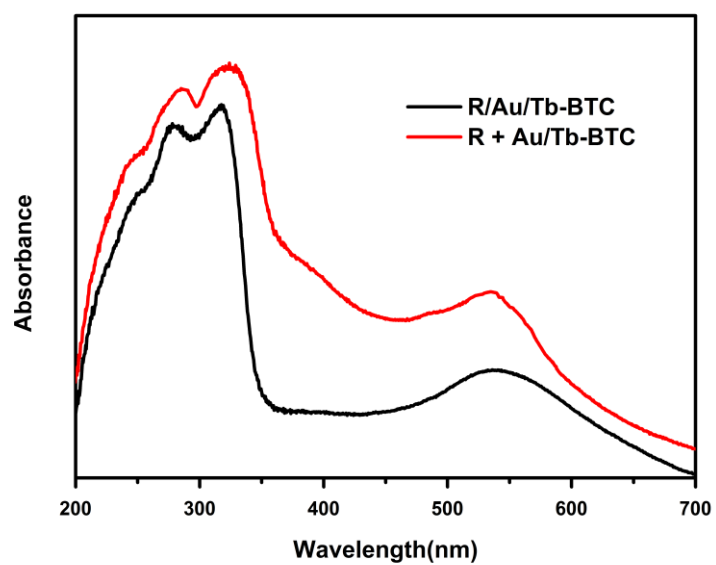

**Figure S2** UV-vis spectra of R + Au/Tb-BTC and R/Au/Tb-BTC.
